# Supplementary material
Source: Springer Nature journal article supplement (https://www.springermedizin.de/resource/supplementary/12875_2013_1081_MOESM3_ESM.pdf/9435768)

Initial Analysis tool  
(proforma) based on Flocke

Analysis of 13 videos by  
individuals using tool

Group discussion

Is tool  
satisfactory?

No

Redesign of proforma,  
update of coding manual

Yes

Review by wider panel of  
clinicians/researchers

Is tool  
satisfactory?

No

Yes

Analysis of 60 videos Inter-  
rater assessment

Use of tool in main study  
(229 consultations)

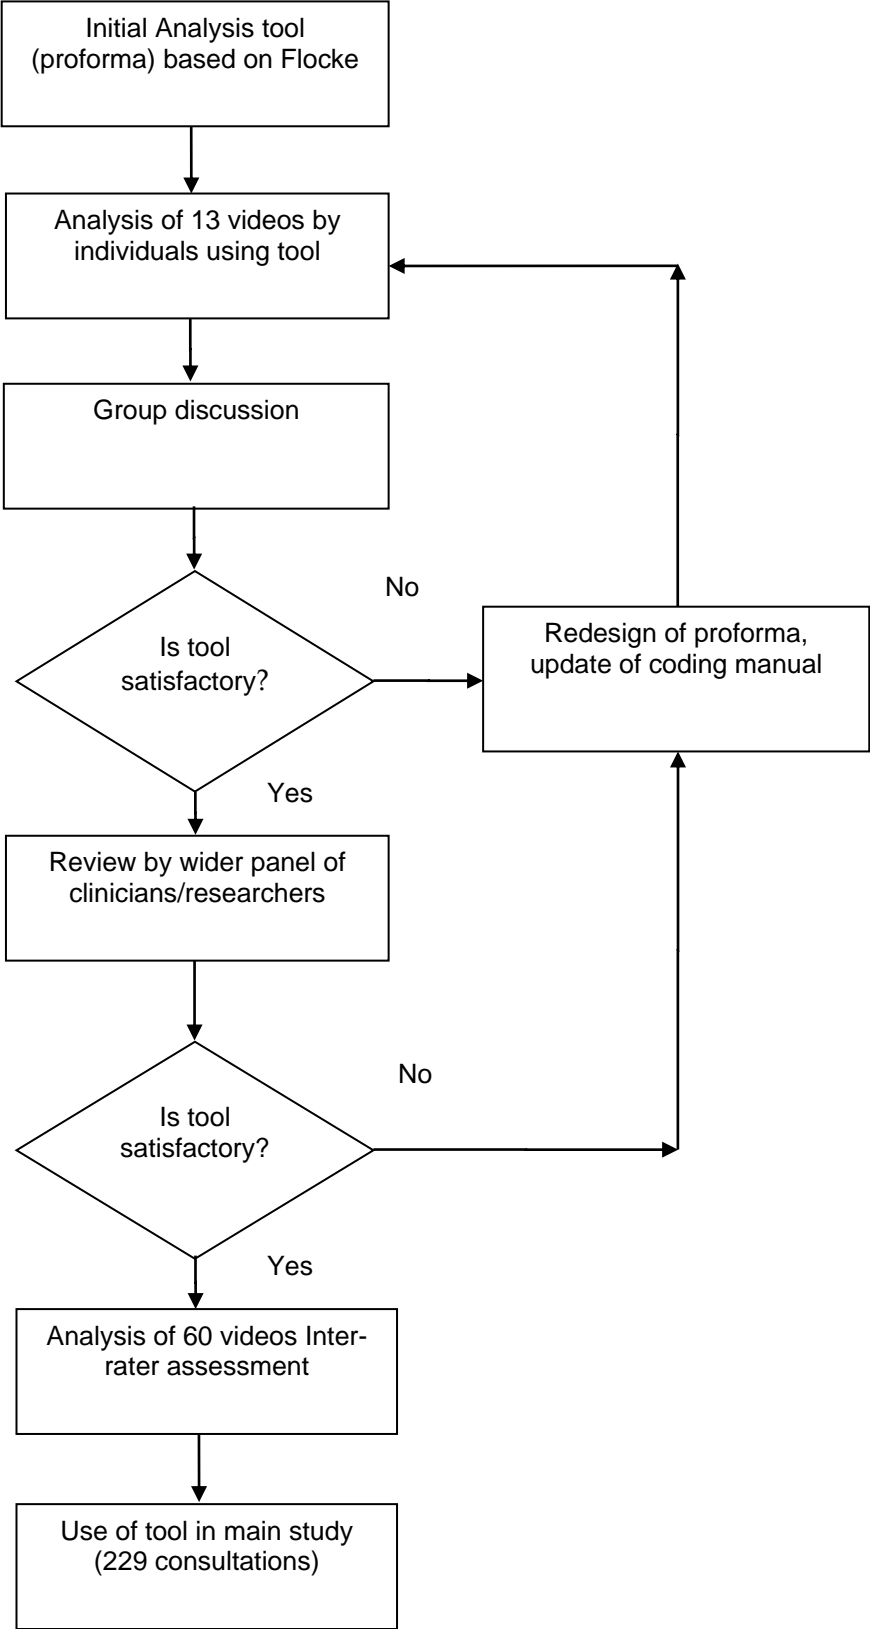

Supplement: MOESM3 [file 9435768]
